# Supplementary material
Source: PubMed Central journal article supplement (PMC1963496)
Supplement: pcbi.0030163.st001.pdf [file pcbi.0030163.st001.pdf]

**Supplementary Table 1.** List of compounds in the logical T-cell model. Model name corresponds to the name in Fig. 1 and the Supplementary Table 2. Common abbreviations are those usually used in the literature, while name is the whole name. Type classifies the molecules, if applies, as follows: K =Kinase, T=Transcription Factor, P = Phosphatase, A =Adaptor Protein, R = Receptor, G= GTP-ase. In the case where two pools of a molecule were considered, a'reservoir' was included which was required for both pools. This allows to perform a simultaneous knock-out of both pools.

| Nr | Model Name | Common abbreviation     | Name                                                                                | Type |
|----|------------|-------------------------|-------------------------------------------------------------------------------------|------|
| 1  | abl        | Abl                     | Abelson protein tyrosine kinase                                                     | K    |
| 2  | akap79     | Akap79                  | A kinase (PRKA) anchor protein 79                                                   | A    |
| 3  | ap1        | Ap1                     | v-jun sarcoma virus 17 oncogene homology                                            | T    |
| 4  | bad        | Bad                     | BCL2-antagonist of cell death                                                       |      |
| 5  | Bcat       | -catenin                | Catenin (cadherin-associated protein) beta 1                                        |      |
| 6  | bcl10      | BCL10                   | B-cell CLL/lymphoma 10                                                              |      |
| 7  | bclxl      | BCL2L1                  | BCL2-like 1                                                                         |      |
| 8  | ca         | CA, Ca <sup>2+</sup>    | Calcium                                                                             |      |
| 9  | cabin1     | Cabin1, CAIN            | Calcineurin-binding protein                                                         |      |
| 10 | calcin     | Calcineurin             | Calcineurin                                                                         | P    |
| 11 | calpr1     | Csp1                    | Calciressin 1                                                                       |      |
| 12 | cam        | CaM                     | Calmodulin                                                                          |      |
| 13 | camk2      | Camk2,CamKII            | calcium/calmodulin-dependent protein kinase (CaM kinase) II                         | K    |
| 14 | camk4      | CamK4, CamKIV           | calcium/calmodulin-dependent protein kinase IV                                      | K    |
| 15 | card11a    | CARD11 + CARMA1 + BCL10 | Complex of CARD11, CARMA1, and BCL10, which is their fully active form (see Fig. 1) |      |
| 16 | card11     | CARMA1, CARD11          | caspase recruitment domain family, member 11                                        |      |
| 17 | cblb       | Cbl-b                   | Cas-Br-M (murine) ecotropic retroviral transforming sequence b                      |      |
| 18 | ccblp1     | c-Cbl                   | Casitase B-lineage lymphoma proto-oncogene (ZAP70-dependent pool)                   | A    |
| 19 | ccblp2     | c-Cbl                   | Casitase B-lineage lymphoma proto-oncogene (Fyn-dependent pool)                     | A    |

| <b>Nr</b> | <b>Model Name</b> | <b>Common abbreviation</b> | <b>Name</b>                                                                                 | <b>Type</b> |
|-----------|-------------------|----------------------------|---------------------------------------------------------------------------------------------|-------------|
| 20        | ccblr             | c-Cbl                      | Casitase B-lineage lymphoma proto-oncogene (Reservoir, see legend)                          | A           |
| 21        | cd28              | CD28                       | CD28 antigen (Tp44)                                                                         | R           |
| 22        | cd45              | CD45, PTPRC                | protein tyrosine phosphatase, receptor type, C                                              | P           |
| 23        | cd4               | CD4, p55                   | CD4 antigen (p55)                                                                           | R           |
| 24        | cdc42             | CDC42, BB1                 | cell division cycle 42 (GTP binding protein, 25kDa)                                         | G           |
| 25        | cre               | Cre                        | cAMP responsive element binding protein 1                                                   |             |
| 26        | creb              | CREB, CREB1                | cAMP responsive element                                                                     | T           |
| 27        | csk               | Csk                        | c-src tyrosine kinase                                                                       | K           |
| 28        | cyc1              | Cyc1                       | cytochrome c-1                                                                              |             |
| 29        | dag               | DAG                        | Diacylglycerol                                                                              |             |
| 30        | dgk               | DGK                        | diacylglycerol kinase                                                                       | K           |
| 31        | erk               | ERK, MAPK1                 | Extracellular signal-regulated kinases, mitogen-activated protein kinase 1                  | K           |
| 32        | fkhr              | FOXO1, fkhr                | forkhead box O1A                                                                            | T           |
| 33        | fos               | Fos, FRA                   | FOS-like antigen                                                                            |             |
| 34        | fyn               | Fyn                        | FYN oncogene related to SRC, FGR, YES                                                       | K           |
| 35        | gab2              | Gab2                       | GRB2-associated binding protein 2                                                           | A           |
| 36        | gadd45            | GADD45A                    | growth arrest and DNA-damage-inducible, alpha                                               |             |
| 37        | gads              | GRAP-2, GADS, P38          | GRB2-related adaptor protein 2                                                              | A           |
| 38        | gap               | GAP                        | GTPase-activating protein                                                                   |             |
| 39        | grb2              | Grb2                       | growth factor receptor-bound protein 2                                                      |             |
| 40        | sos               | Sos1                       | Son of sevenless homolog 1                                                                  |             |
| 41        | gsk3              | GSK3                       | glycogen synthase kinase 3                                                                  | K           |
| 42        | hpk1              | HPK1, MAP4K1               | Hematopoietic progenitor kinase 1, mitogen-activated protein kinase kinase kinase 1         | K           |
| 43        | ikb               | IκB                        | Inhibitor protein IκB                                                                       |             |
| 44        | ikkab             | IκKA + IκKB                | inhibitor of kappa light polypeptide gene enhancer in B-cells, kinase alpha and kinase beta |             |

| <b>Nr</b> | <b>Model Name</b> | <b>Common abbreviation</b> | <b>Name</b>                                                                 | <b>Type</b> |
|-----------|-------------------|----------------------------|-----------------------------------------------------------------------------|-------------|
| 45        | ikkg              | IκKG                       | inhibitor of kappa light polypeptide gene enhancer in B-cells, kinase gamma |             |
| 46        | ip3               | IP3K                       | inositol 1,4,5-trisphosphate                                                | K           |
| 47        | itk               | ITK                        | IL2-inducible T-cell kinase                                                 | K           |
| 48        | jnk               | JNK, SAPK, MAPK8           | mitogen-activated protein kinase 8                                          | K           |
| 49        | jun               | JUN, ap1                   | v-jun sarcoma virus 17 oncogene homolog                                     | T           |
| 50        | lat               | LAT                        | linker for activation of T cells                                            | A           |
| 51        | lckp1             | Lck                        | lymphocyte-specific protein tyrosine kinase ( CD4-dependent pool)           | K           |
| 52        | lckp2             | Lck                        | lymphocyte-specific protein tyrosine kinase (CD28/TCR-dependent pool)       | K           |
| 53        | lckr              | Lck                        | lymphocyte-specific protein tyrosine kinase (Reservoir, see legend)         | K           |
| 54        | malt1             | MALT1                      | mucosa associated lymphoid tissue lymphoma translocation gene 1             |             |
| 55        | mek               | MEK, MAP2K, MAPKK          | mitogen-activated protein kinase kinase                                     | K           |
| 56        | mekk1             | MEKK1, MAP3K1, MAPKKK1     | mitogen-activated protein kinase kinase kinase                              | K           |
| 57        | mkk4              | MKK4, MAP2K4, MAPKK4       | mitogen-activated protein kinase kinase 4                                   | K           |
| 58        | mlk3              | MLK3, MAP3K11              | mitogen-activated protein kinase kinase kinase 11                           | K           |
| 59        | nfat              | NFATC1, NFATC2, NFATC3     | nuclear factor of activated T-cells, cytoplasmic, calcineurin-dependent 1   | T           |
| 60        | nfkb              | NfκB                       | nuclear factor of kappa light polypeptide gene enhancer in B-cells 1, 2     | T           |
| 61        | p21c              | P21Cip1, Cdkn1a, p21       | cyclin-dependent kinase inhibitor 1A (p21, Cip1)                            |             |
| 62        | p27k              | CDKN1B, p27Kip1            | cyclin-dependent kinase inhibitor 1B (p27, Kip1)                            |             |
| 63        | p38               | P38, MAPK14                | mitogen-activated protein kinase 14                                         | K           |
| 64        | p70s              | RPS6KB1, p70s6k            | ribosomal protein S6 kinase, 70kDa, polypeptide 1                           | K           |

| <b>Nr</b> | <b>Model Name</b> | <b>Common abbreviation</b>                                       | <b>Name</b>                                                                                                       | <b>Type</b> |
|-----------|-------------------|------------------------------------------------------------------|-------------------------------------------------------------------------------------------------------------------|-------------|
| 65        | pag               | PAG1                                                             | phosphoprotein associated with glycosphingolipid microdomains 1                                                   | A           |
| 66        | pdk1              | PDPK1, PDK1                                                      | 3-phosphoinositide dependent protein kinase-1                                                                     | K           |
| 67        | pi3k              | PI3K, PIK3CA                                                     | phosphoinositide-3-kinase, catalytic, alpha polypeptide                                                           | K           |
| 68        | pip3              | PIP3                                                             | Phosphatidylinositol (3,4,5)-trisphosphate                                                                        |             |
| 69        | pkb               | PKB, AKT1                                                        | v-akt murine thymoma viral oncogene homolog 1                                                                     | K           |
| 70        | pkcth             | Prkcq, PKC- $\gamma$                                             | protein kinase C, theta                                                                                           | K           |
| 71        | plcga             | Active form of PLC $\gamma$ 1, PLC-gamma-1                       | phospholipase C, gamma 1                                                                                          |             |
| 72        | plcgb             | PLCG1, PLC- $\gamma$ -1 bound to LAT (but not active, see plcga) | phospholipase C, gamma 1                                                                                          |             |
| 73        | pten              | PTEN                                                             | phosphatase and tensin homolog (mutated in multiple advanced cancers 1)                                           | P           |
| 74        | rac1p1            | RAC1, p21-Rac1, MIG5                                             | ras-related C3 botulinum toxin substrate 1 (rho family, small GTP binding protein Rac1) (Vav-1 dependent pool)    | G           |
| 75        | rac1p2            | RAC1, p21-Rac1, MIG5                                             | ras-related C3 botulinum toxin substrate 1 (rho family, small GTP binding protein Rac1) (Vav-3 dependent pool)    | G           |
| 76        | rac1r             | RAC1, p21-Rac1, MIG5                                             | ras-related C3 botulinum toxin substrate 1 (rho family, small GTP binding protein Rac1) (Reservoir, see footnote) | G           |
| 77        | raf               | RAF1                                                             | v-raf-1 murine leukemia viral oncogene homolog 1                                                                  | K           |
| 78        | ras               | Ras                                                              | Ras                                                                                                               | G           |
| 79        | rasgrp            | RasGRP1                                                          | Ras guanyl releasing protein 1                                                                                    |             |
| 80        | rlk               | TXK, RLK, TKL                                                    | TXK tyrosine kinase                                                                                               | K           |
| 81        | rsk               | RPS6KA1, RSK                                                     | ribosomal protein S6 kinase, 90kDa, polypeptide 1                                                                 | K           |

| <b>Nr</b> | <b>Model Name</b> | <b>Common abbreviation</b> | <b>Name</b>                                                                       | <b>Type</b> |
|-----------|-------------------|----------------------------|-----------------------------------------------------------------------------------|-------------|
| 82        | Sh3bp2            | 3BP2, SH3BP2               | SH3-domain binding protein 2                                                      | A           |
| 83        | ship1             | INPP5D, SHIP1              | inositol polyphosphate-5-phosphatase, 145kDa                                      | P           |
| 84        | shp1              | Shp1, PTPN6                | protein tyrosine phosphatase, non-receptor type 6                                 | P           |
| 85        | shp2              | SHP2, PTPN11               | protein tyrosine phosphatase, non-receptor type 11 (Noonan syndrome 1)            | P           |
| 86        | slp76             | LCP2, SLP76                | lymphocyte cytosolic protein 2 (SH2 domain containing leukocyte protein of 76kDa) | A           |
| 87        | sre               | Sre                        | Serum responsive element                                                          |             |
| 88        | tcrb              | TCR                        | T-cell Receptor (bound to ligand)                                                 | R           |
| 89        | tcrlig            | PMHC, Ab                   | Ligand of T cell receptor (peptide-MHC complex or antibody)                       | R           |
| 90        | tcrp              | TCR                        | T-cell Receptor phosphorylated                                                    | R           |
| 91        | vav1              | VAV1                       | Vav 1 oncogene                                                                    |             |
| 92        | vav3              | VAV3                       | Vav 3 oncogene                                                                    |             |
| 93        | X                 | -                          | Non-identified kinase involved in CD28-mediated signaling (see main text)         | K           |
| 94        | zap70             | ZAP70                      | zeta-chain (TCR) associated protein kinase 70kDa                                  | K           |
